# Supplementary material
Source: PubMed Central journal article supplement (PMC4375320)
Supplement: AEM.03802-14_zam999116183so1.pdf [file AEM.03802-14_zam999116183so1.pdf]

1 Supplemental materials for the manuscript entitled  
2 **Culture-independent evaluation of non-enveloped virus infectivity reduced by free**  
3 **chlorine disinfection**

4 Daisuke Sano, Takatomo Ohta, Arata Nakamura, Toyoko Nakagomi, Osamu Nakagomi,  
5 and Satoshi Okabe

6  
7 **Containing:**

8 **4 pages**

9 **7 table**

10

11 Submitted to *Applied and Environmental Microbiology*, Nov 2014.

**Table S1.** Primers used in this study

| Target           | Primer   | Sequence (5'-3')                 | Reference              |
|------------------|----------|----------------------------------|------------------------|
| Murine norovirus | MNV-S    | CCGCAGGAACGCTCAGCAG              | Kitajima et al. 2010   |
|                  | MNV-AS   | GGYTGAATGGGGACGGCCTG             |                        |
|                  | MNV-TP   | FAM-ATGAGTGATGGCGCA-MGB-NFQ      |                        |
| Mengovirus vMC0  | Mengo110 | GCGGGTCCTGCCGAAAGT               | Costafreda et al. 2006 |
|                  | Mengo209 | GAAGTAACATATAGACAGACGCACAC       |                        |
|                  | Mengo147 | FAM-ATCACATTACTGGCCGAAGC-NFQ-MGB |                        |

**References**

**Kitajima M, Oka T, Tohya Y, Katayama H, Takeda N, Katayama K.** 2009. Development and application of a broadly reactive real-time reverse transcription-PCR assay to detect murine noroviruses. *J. Virol Meth.* **169**(2):269-273.

**Costafreda MI, Bosch A, Pinto RM.** 2006. Development, evaluation, and standardization of a real-time TaqMan reverse transcription-PCR assay for quantification of hepatitis A virus in clinical and shellfish samples. *Appl. Environ. Microbiol.* **72**(6):3846-3855.

25

Table S2. Regression statistics for Fig. 1

|                                       |      |
|---------------------------------------|------|
| Multiple correlation coefficient      | 0.90 |
| Coefficient of determination          | 0.81 |
| Adjusted coefficient of determination | 0.79 |
| Standard error                        | 5.5  |
| Observations                          | 13   |

26

Table S3. Analysis of variance for Fig. 1

|            | df | SS      | MS      | F     | Significance<br>F |
|------------|----|---------|---------|-------|-------------------|
| Regression | 1  | 1384.92 | 1384.92 | 46.09 | 2.998E-05         |
| Residual   | 11 | 330.55  | 30.05   |       |                   |
| Total      | 12 | 1715.47 |         |       |                   |

27

Table S4. Regression coefficients for Fig. 1

|           | Coefficients | Standard error | t Stat | p value  | Lower 95% | Upper<br>95% |
|-----------|--------------|----------------|--------|----------|-----------|--------------|
| Intercept | 92.70        | 4.30           | 21.6   | 2.38E-10 | 83.2      | 102.2        |
| Slope     | -7.94        | 1.17           | -6.79  | 3.00E-05 | -10.6     | -5.4         |

28

29

30

Table S5. Regression statistics for Fig. 2

|                                       |      |
|---------------------------------------|------|
| Multiple correlation coefficient      | 0.88 |
| Coefficient of determination          | 0.78 |
| Adjusted coefficient of determination | 0.77 |
| Standard error                        | 8.75 |
| Observations                          | 15   |

31

Table S6. Analysis of variance for Fig. 2

|            | df | SS      | MS      | F         | Significance<br>F |
|------------|----|---------|---------|-----------|-------------------|
| Regression | 1  | 3579.74 | 3579.74 | 46.751339 | 0.000012          |
| Residual   | 13 | 995.41  | 76.57   |           |                   |
| Total      | 14 | 4575.15 |         |           |                   |

32

Table S7. Regression coefficients for Fig. 2

|           | Coefficients | Standard<br>error | t Stat | p value  | Lower 95% | Upper 95% |
|-----------|--------------|-------------------|--------|----------|-----------|-----------|
| Intercept | 108          | 6.59              | 16.3   | 4.81E-10 | 93.4      | 93.4      |
| Slope     | -7.3         | 1.07              | -6.84  | 1.19E-05 | -9.66     | -9.66     |

33
